# Supplementary material for: Perturbation of microRNAs in Rat Heart during Chronic Doxorubicin Treatment
Source: PLoS One. 2012 Jul 31;7(7):e40395. doi: 10.1371/journal.pone.0040395 (PMC3409211; doi:10.1371/journal.pone.0040395)
Supplement: Table S1 — Study design. (XLS) [file pone.0040395.s003.xls]

## Sheet: Sheet1
				No. of	Doxorubicin	Dexrazoxane	Etoposide	Dose
				animals				duration
Group				Male	(mg/kg/week)	(mg/kg/week)	(mg/kg/week)	(weeks)
1	Control			6	0	0	0	2
2	DOX Low			6	1	0	0	2
3	DOX Mid			6	2	0	0	2
4	DOX High			6	3	0	0	2
5	EPS Low			6	0	0	1	2
6	EPS High			6	0	0	3	2
7	DZR			6	0	50	0	2
8	DZR + DOX Mid			6	2	50	0	2
9	Control			6	0	0	0	4
10	DOX Mid			6	2	0	0	4
11	DOX High			6	3	0	0	4
12	Control			6	0	0	0	6
13	DOX Low			6	1	0	0	6
14	DOX Mid			6	2	0	0	6
15	DOX High			6	3	0	0	6
16	EPS Low			6	0	0	1	6
17	EPS High			6	0	0	3	6
18	DZR			6	0	50	0	6
19	DZR + DOX Mid			6	2	50	0	6
