# Supplementary material for: Perturbation of microRNAs in Rat Heart during Chronic Doxorubicin Treatment
Source: PLoS One. 2012 Jul 31;7(7):e40395. doi: 10.1371/journal.pone.0040395 (PMC3409211; doi:10.1371/journal.pone.0040395)
Supplement: Table S3 — Spearman correlations of microRNAs levels and cumulative vacuolation severity in the heart tissue of rats treated with DOX. (XLS) [file pone.0040395.s005.xls]

## Sheet: Sheet1
MicroRNA	p-value	FStat	Rank R squared	Rank R
mir-208b	0.000445	28.92	0.76	0.87
mir-215	0.00171	19.38	0.68	0.83
mir-216b	0.00468	13.92	0.61	0.78
mir-367	0.0104	10.41	0.54	0.73
mir-34c	0.339	1.02	0.1	0.32
